# Supplementary material
Source: MDPI journal article supplement (https://www.mdpi.com/2073-4395/11/9/1889)
Supplement: s1 [file s1]

**Table S1.** Chemical analysis of arable soils during the studied growing seasons.

| Specification                                                                | Year   |        |        | Mean   |
|------------------------------------------------------------------------------|--------|--------|--------|--------|
|                                                                              | 2015   | 2016   | 2017   |        |
| pH <sub>H2O</sub>                                                            | 6.98   | 6.01   | 6.25   | 6.41   |
| Humus content [%]                                                            | 1.80   | 1.98   | 2.07   | 1.95   |
| The content of assimilable macroelements in the of 0-30 cm soil layer [mg/l] |        |        |        |        |
| N-NO <sub>3</sub>                                                            | 16     | 17     | 14     | 15.67  |
| P                                                                            | 73     | 71     | 77     | 73.67  |
| K                                                                            | 145    | 108    | 193    | 148.67 |
| Ca                                                                           | 780    | 534    | 474    | 596.00 |
| Mg                                                                           | 69     | 62     | 65     | 65.33  |
| The content of assimilable microelements in the of 0-30 cm soil layer [mg/l] |        |        |        |        |
| Cu                                                                           | 1.74   | 1.58   | 2.34   | 1.89   |
| Zn                                                                           | 14.83  | 11.82  | 25.00  | 17.22  |
| Mn                                                                           | 16.36  | 25.84  | 50.08  | 30.76  |
| Fe                                                                           | 145.12 | 179.11 | 173.60 | 165.94 |
| B                                                                            | 0.50   | 0.30   | 0.40   | 0.40   |

**Table S2.** Weather conditions in the region of experiment in the years 2015–2017.

| Meteorological factor                   | Year                 | Month |       | Sum/mean |
|-----------------------------------------|----------------------|-------|-------|----------|
|                                         |                      | IV    | V     |          |
| Sum of precipitation (mm)               | 2015                 | 39.5  | 294.6 | 334.1    |
|                                         | 2016                 | 77.9  | 60.7  | 138.6    |
|                                         | 2017                 | 64.7  | 22.8  | 87.5     |
|                                         | Sum for 1977-2007    | 50.2  | 65.3  | 115.5    |
|                                         |                      |       |       |          |
| Mean daily air temperature (°C)         | 2015                 | 9.1   | 12.6  | 10.9     |
|                                         | 2016                 | 10.2  | 18.7  | 14.5     |
|                                         | 2017                 | 9.8   | 15.0  | 12.4     |
|                                         | Mean for 1977-2007   | 8.1   | 13.7  | 10.9     |
|                                         |                      |       |       |          |
| Sielianinov hydrotermic coefficient (K) | 2015                 | 1.4   | 7.5   | 4.5      |
|                                         | 2016                 | 2.5   | 1.4   | 1.9      |
|                                         | 2017                 | 2.2   | 0.5   | 1.4      |
|                                         | Mean K for 1977-2007 | 2.1   | 1.5   | 1.8      |
|                                         |                      |       |       |          |

K ≤ 0.4 - extremely dry month; 0.4 < K ≤ 0.7 –very dry; 0.7 < K ≤ 1.0 –dry; 1.0 < K ≤ 1.3 –quite dry; 1.3 < K ≤ 1.6 –optimal; 1.6 < K ≤ 2.0 –moderately humid; 2.0 < K ≤ 2.5 –humid; 2.5 < K ≤ 3.0 –very humid; K > 3.0 –extremely humid.

**Table S3.** Relationship between the assimilable macro- and micronutrient forms, and biodiversity indices of microorganism community colonizing infected seedlings (correlation coefficients).

| Independent variables ( $x$ ) | Dependent variables ( $y$ ) |                                  |                         |                               |
|-------------------------------|-----------------------------|----------------------------------|-------------------------|-------------------------------|
|                               | The species richness (S)    | Simpson's Reciprocal Index (1/D) | Shannon-Wiener ( $H'$ ) | Evenness (Shannon) ( $J_H'$ ) |
| pH $H_2O$                     | -0.18                       | -0.61                            | -0.64                   | -0.61                         |
| Humus content                 | 0.59                        | 0.55                             | 0.60                    | 0.59                          |
| N                             | 0.08                        | -0.04                            | -0.09                   | -0.12                         |
| P                             | -0.08                       | -0.03                            | 0.09                    | 0.12                          |
| K                             | -0.17                       | -0.03                            | 0.02                    | 0.05                          |
| Ca                            | -0.65                       | -0.59                            | -0.63                   | -0.61                         |
| Mg                            | -0.73                       | -0.59                            | -0.60                   | -0.56                         |
| Cu                            | 0.01                        | 0.12                             | 0.18                    | 0.19                          |
| Zn                            | -0.00                       | 0.11                             | 0.17                    | 0.19                          |
| Mn                            | 0.35                        | 0.39                             | 0.44                    | 0.45                          |
| Fe                            | 0.73                        | 0.62                             | 0.65                    | 0.62                          |
| B                             | -0.72                       | -0.57                            | -0.58                   | -0.54                         |
| Explanations:                 |                             |                                  |                         |                               |
| $r_{xy} > 0.9$                | Very strong dependence      |                                  |                         |                               |
| $0.7 < r_{xy} < 0.9$          | Quite strong dependence     |                                  |                         |                               |
| $0.4 < r_{xy} < 0.7$          | Moderate dependence         |                                  |                         |                               |
| $0.2 < r_{xy} < 0.4$          | Weak dependence             |                                  |                         |                               |
| $r_{xy} < 0.2$                | No dependency               |                                  |                         |                               |
